# Supplementary material for: Buffering of Segmental and Chromosomal Aneuploidies in Drosophila melanogaster
Source: PubMed Central journal article supplement (PMC2668767; doi:10.1371/journal.pgen.1000465), 2009-05-01

**A**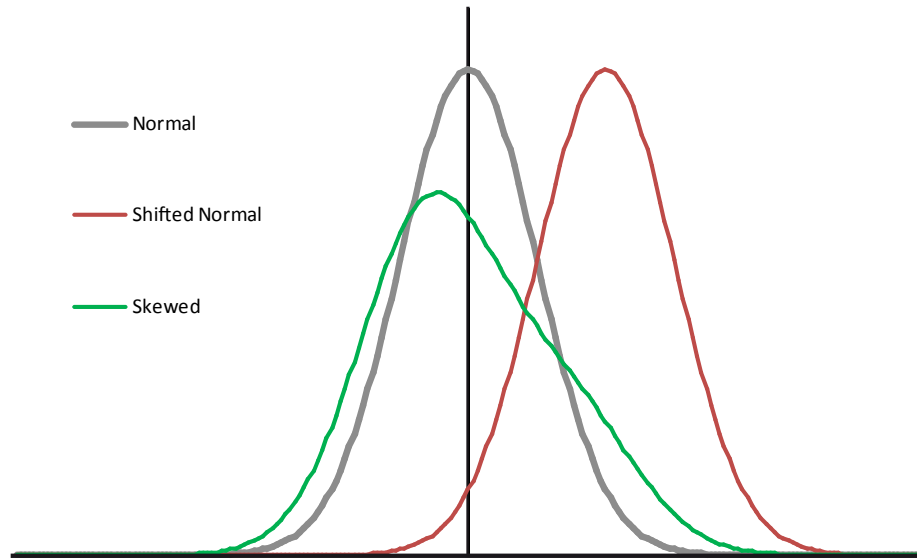**B**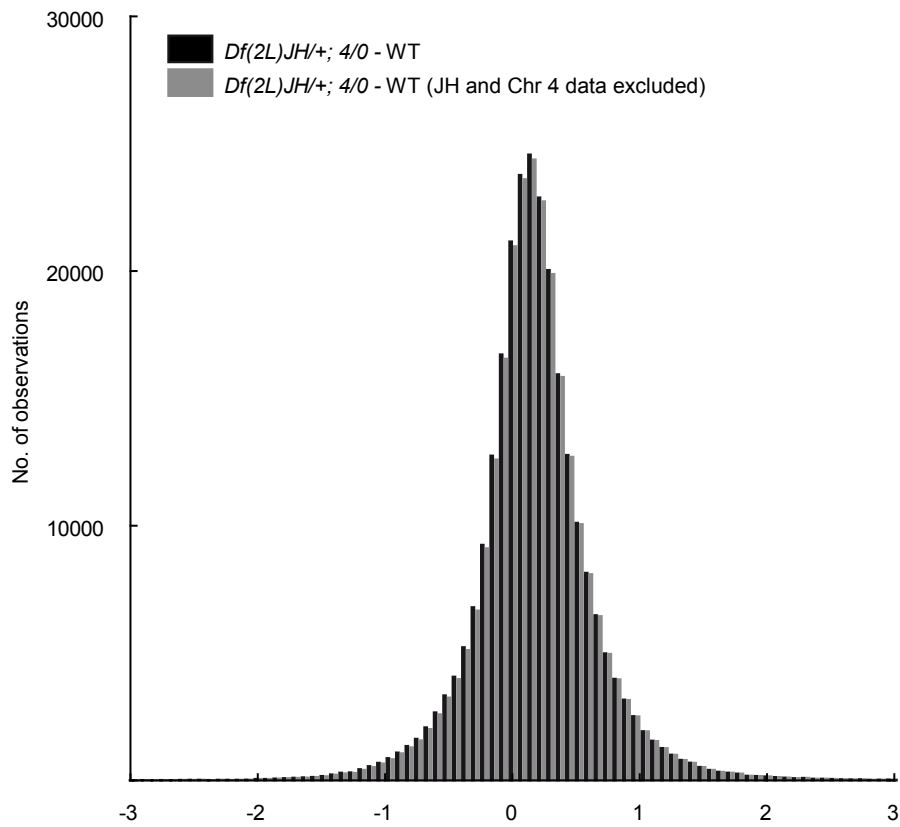

Supplement: pgen.1000465.s001.pdf [file pgen.1000465.s001.pdf]
