# Supplementary material for: Buffering of Segmental and Chromosomal Aneuploidies in Drosophila melanogaster
Source: PubMed Central journal article supplement (PMC2668767; doi:10.1371/journal.pgen.1000465), 2009-05-01
Supplement: pgen.1000465.s006.pdf [file pgen.1000465.s006.pdf]

| <b>Flies (adult females)</b>                       | <b>Dose</b> | <b>Affected genes</b> | <b>Genes expressed &gt;6</b> | <b>Length</b>      |
|----------------------------------------------------|-------------|-----------------------|------------------------------|--------------------|
| WT                                                 | 2x          |                       |                              |                    |
| <i>Df(2L)J-H/+; 4/0</i>                            | 1x          | 2L:88; 4:105          | 2L:48; 4:72                  | ~550kb; Entire 4th |
| <i>Dp(2;2)Cam3/+; 4/4/4</i>                        | 3x          | 2L:405; 4:105         | 2L:240; 4:72                 | ~2.5Mb; Entire 4th |
| <i>Df(3L)ED4470/+</i>                              | 1x          | 3L:126                | 3L:58                        | 736kb              |
| <i>Df(2L)ED4651/+</i>                              | 1x          | 2L:93                 | 2L:60                        | 604kb              |
| <i>Df(2L)J-H/+</i>                                 | 1x          | 2L:88                 | 2L:48                        | ~550kb             |
| <i>4/0</i>                                         | 1x          | 4:105                 | 4:72                         | Entire 4th         |
| <i>Pof<sup>Δ119</sup> (Pof<sup>-</sup>)</i>        | 2x          |                       |                              |                    |
| <i>Pof<sup>Δ119</sup> (Pof<sup>-</sup>); 4/4/4</i> | 3x          | 4:105                 | 4:72                         | Entire 4th         |

  

| <b>Testes</b>                               | <b>Dose</b> | <b>Affected genes</b> | <b>Genes expressed &gt;6</b> | <b>Length</b> |
|---------------------------------------------|-------------|-----------------------|------------------------------|---------------|
| WT                                          | 2x          |                       |                              |               |
| <i>Pof<sup>Δ119</sup> (Pof<sup>-</sup>)</i> | 2x          |                       |                              |               |
